# Supplementary material for: A microporous metal–organic framework with both open metal and Lewis basic pyridyl sites for highly selective C2H2/CH4and C2H2/CO2gas separation at room temperature
Source: Royal Society of Chemistry journal article supplement (doi:10.1039/c2ta00155a), 2012-10-16
Supplement: c2ta00155a.pdf [file c2ta00155a.pdf]

## Supporting Information for the manuscript

# A Microporous Metal-Organic Framework with both Open Metal and Lewis Basic Pyridyl Sites for Highly Selective C<sub>2</sub>H<sub>2</sub>/CH<sub>4</sub> and C<sub>2</sub>H<sub>2</sub>/CO<sub>2</sub> Gas Separation at Room Temperature

Hui Xu,<sup>a,b</sup> Yabing He<sup>b</sup>, Zhangjing Zhang<sup>c</sup>, Shengchang Xiang<sup>c</sup>, Jianfeng Cai<sup>a</sup>, Yuanjing Cui<sup>a</sup>, Yu Yang<sup>a</sup>, Guodong Qian<sup>\*a</sup> and Banglin Chen<sup>\*ab</sup>

<sup>a</sup>State Key Laboratory of Silicon Materials, *Cyrus Tang Center* for Sensor Materials and Applications, Department of Materials Science & Engineering, Zhejiang University, Hangzhou, 310027 P. R. China, <sup>b</sup>Department of Chemistry, University of Texas at San Antonio, San Antonio, TX 78249-0698, USA, <sup>c</sup>College of Chemistry and Materials, Fujian Normal University, 3 Shangsang Road, Cangshang Region, Fuzhou, China 350007

\*Corresponding Authors. E-mail:gdqian@zju.edu.cn, banglin.chen@utsa.edu

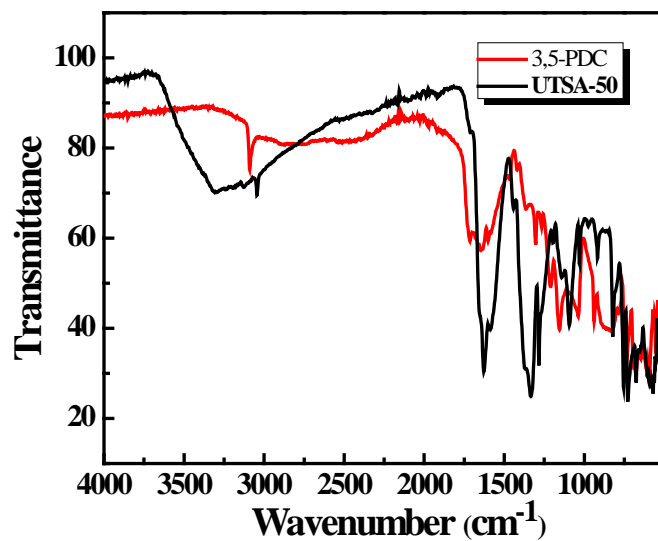

Figure S1. IR spectra of 3,5-PDC and UTSA-50.

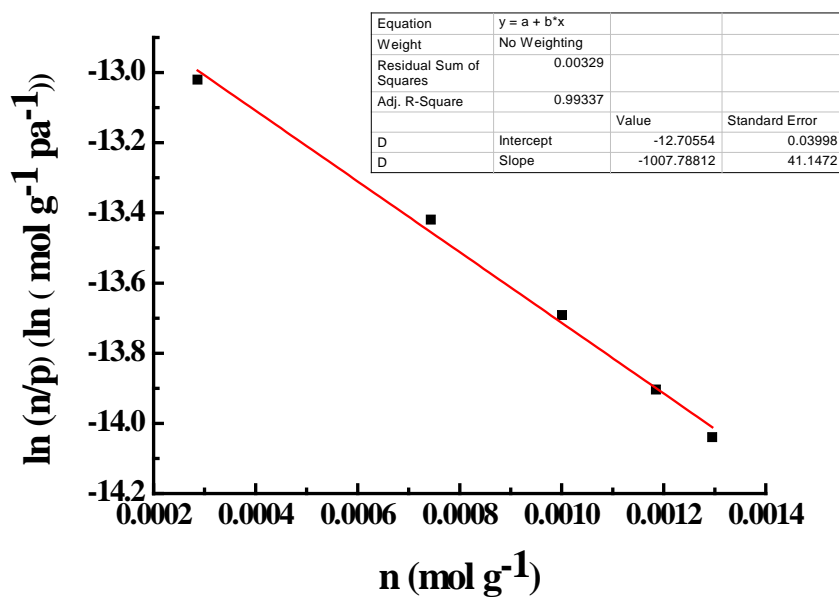

Figure S2. Virial analysis of the adsorption data for C<sub>2</sub>H<sub>2</sub> on UTSA-50 at 273 K: Low pressure data

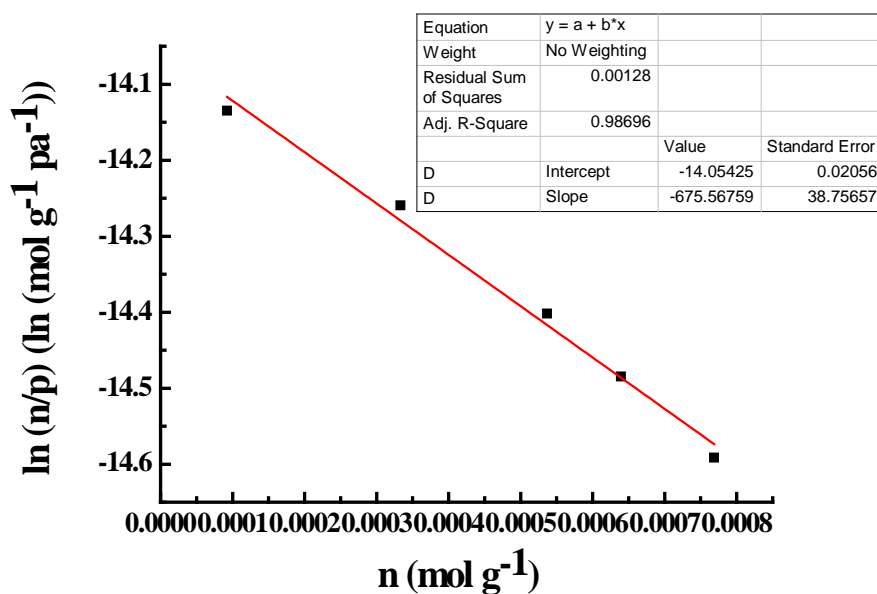

**Figure S3.** Virial analysis of the adsorption data for  $C_2H_2$  on **UTSA-50** at 296 K: Low pressure data

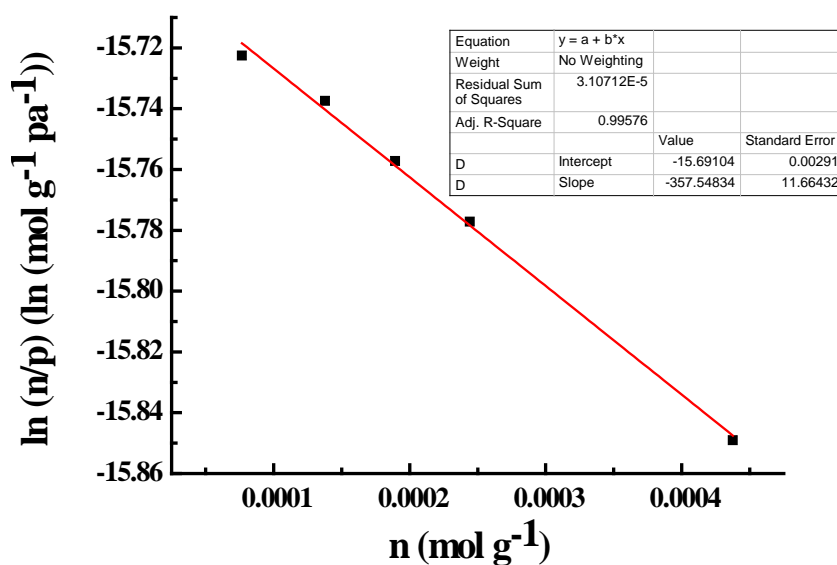

**Figure S4.** Virial analysis of the adsorption data for  $CO_2$  on **UTSA-50** at 273 K: Low pressure data

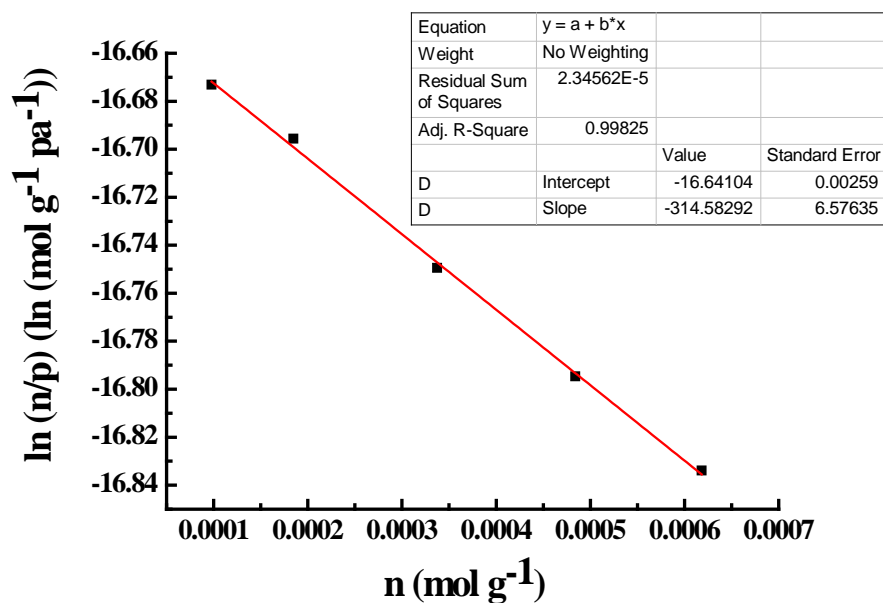

**Figure S5.** Virial analysis of the adsorption data for CO<sub>2</sub> on UTSA-50 at 296 K: Low pressure data

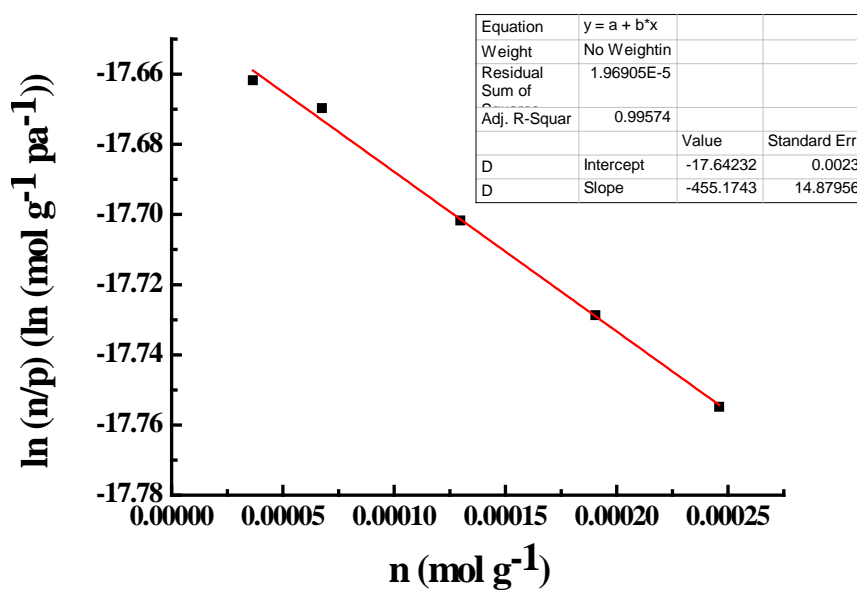

**Figure S6.** Virial analysis of the adsorption data for CH<sub>4</sub> on UTSA-50 at 273 K: Low pressure data

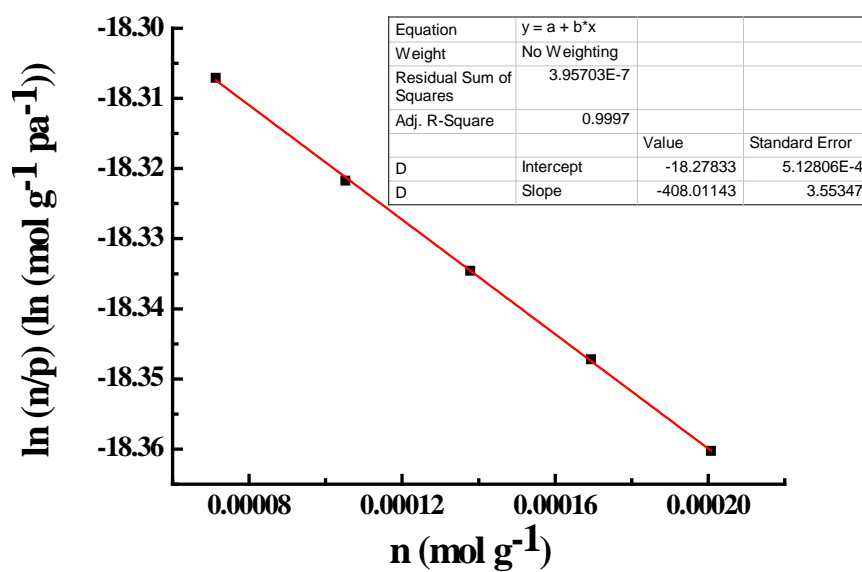

**Figure S7.** Virial analysis of the adsorption data for CH<sub>4</sub> on UTSA-50 at 296 K: Low pressure data
